# Supplementary material for: Product Design to Enhance Consumer Liking of Cull Ewe Meat
Source: MDPI journal article supplement (doi:10.3390/foods10010096), 2021-01-05
Supplement: s1 [file s1]

## Supplementary 1.

### Dry aged mutton dishes; recipes and images.

Author; Dale Lyman\*

\*Dale.Lyman@angliss.edu.au

The William Angliss Institute (WAI)

#### Contents

|                                                                                     |    |
|-------------------------------------------------------------------------------------|----|
| Dry aged mutton dishes; Recipes and images.....                                     | 1  |
| 1. Xinjiang-Style dry aged mutton skewers .....                                     | 2  |
| 2. Greek style mini mutton pitas .....                                              | 3  |
| 3. Mutton sliders, beetroot relish, rocket, mint yoghurt .....                      | 5  |
| 4. Vietnamese style mutton Pho .....                                                | 7  |
| 5. Piccata with textures of corn.....                                               | 9  |
| 6. Smoked mutton with purple salad and creamy fetta sauce .....                     | 11 |
| 7. 10 hour mutton rump on smoked eggplant, coriander chutney and dukkah .....       | 14 |
| 8. Braised shoulder: Grilled cutlet on truffle mash, mushroom crumble, edamame..... | 16 |

## 1. Xinjiang-Style dry aged mutton skewers

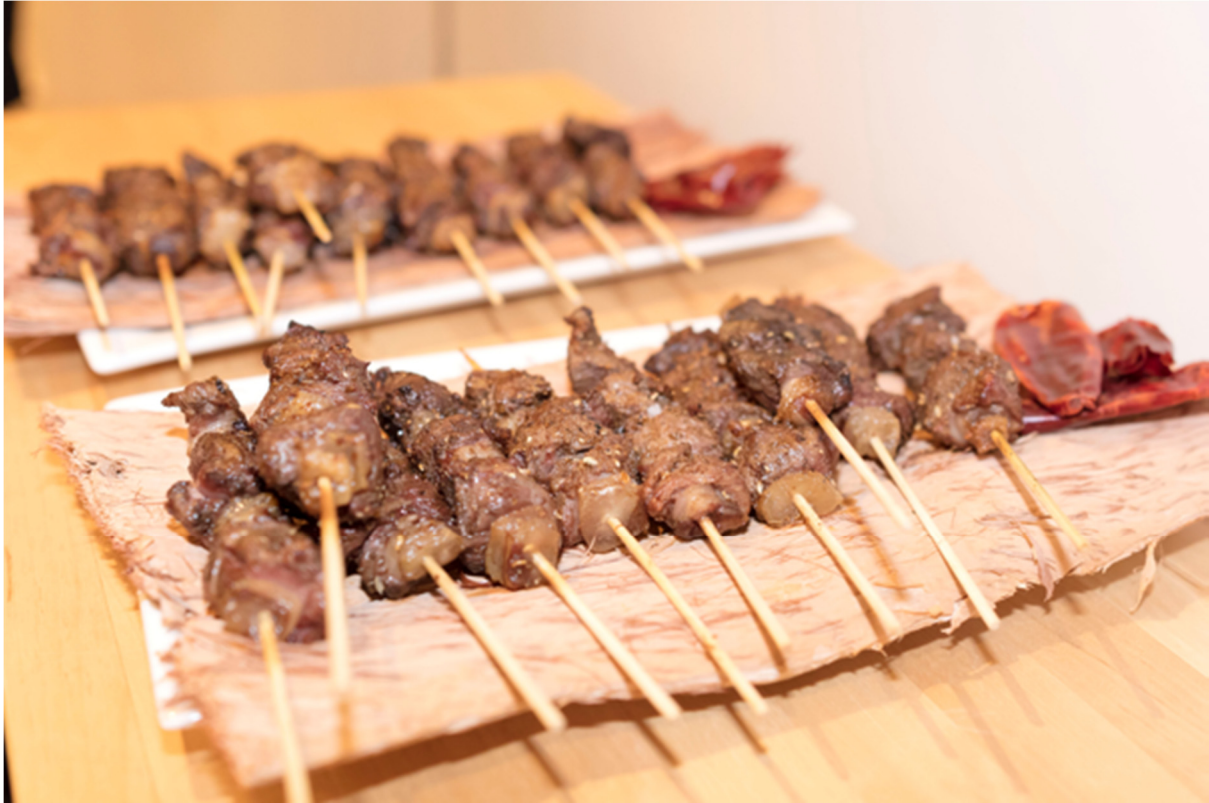

Figure 1. Xinjiang-Style dry aged mutton skewers (WAI, 2018)

### *Appetisers for 10*

#### *Ingredients*

|          |                                                                 |
|----------|-----------------------------------------------------------------|
| 500g     | Mutton shoulder offcuts cut into 15g pieces                     |
| 100g     | Mutton fat chopped into small pieces-no bigger than 10mm square |
| 2 Cloves | Garlic                                                          |
| 1 Tbsp   | Szechuan peppercorns                                            |
| 1 Tbsp   | Coriander seeds                                                 |
| 1 Tbsp   | Cumin seeds                                                     |
| 1 Tbsp   | Red pepper flakes                                               |

#### *Method*

Soak skewers in water for at least twenty minutes to minimise scorching.  
Thread skewers with two pieces of mutton, with a piece of fat between them.  
Finely mince the garlic.  
Mix and grind all of the spices together.  
Combine the garlic and the spices so you have a slightly sticky spice rub.  
Rub the spice rub all over the mutton and leave for 10 minutes.  
Grill Mutton skewers over coals until cooked.

## 2. Greek style wood fired mini mutton pitas

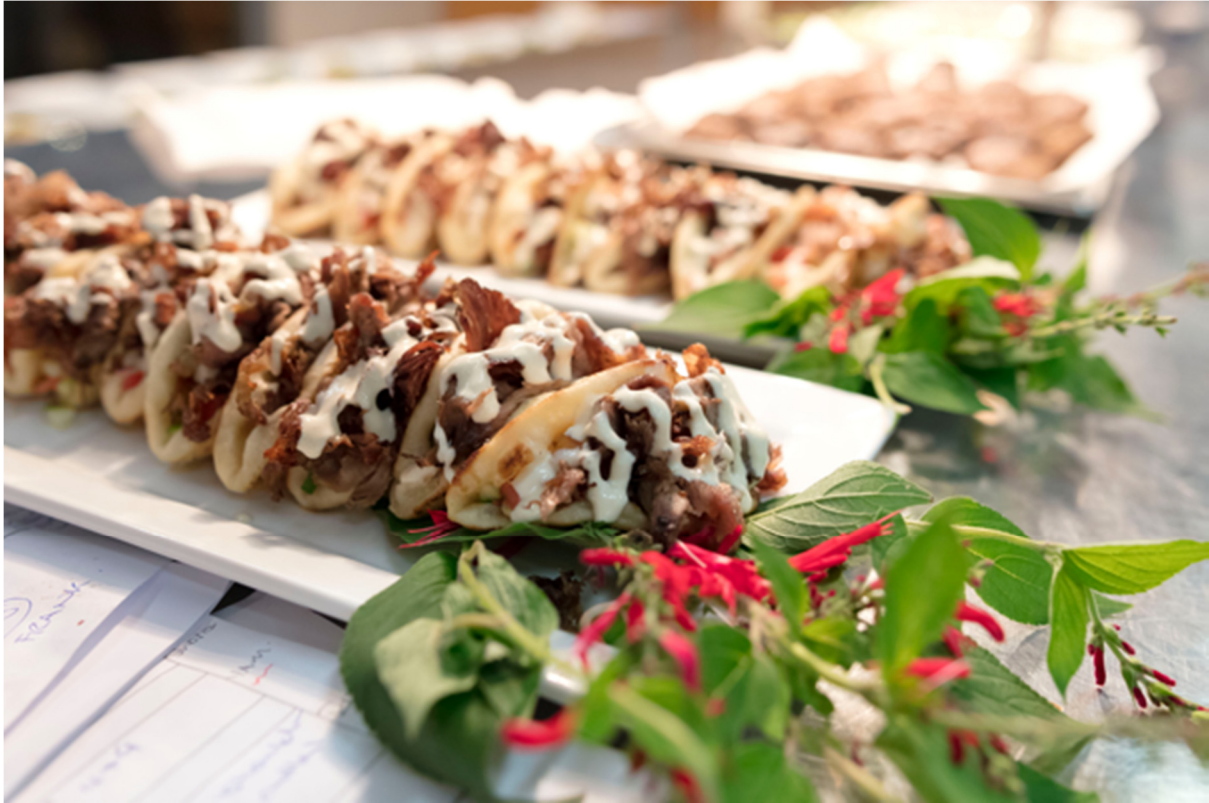

Figure 2. Greek style mini mutton pitas (WAI, 2018)

### *Appetisers for 10*

#### *Mutton filling*

##### *Ingredients*

|        |                                                            |
|--------|------------------------------------------------------------|
| 500g   | Mutton silverside, mostly denuded (remove all silver skin) |
| 1 Tbsp | Oregano chopped                                            |
| 40ml   | Lemon juice                                                |
| 100ml  | Oil olive                                                  |
| 3g     | Salt flakes                                                |

##### *Method*

Marinate meat for 30 minutes.

Roast at 160C, cook to an internal temperature of 65C.

Rest for 15 minutes, slice thinly.

#### *Tahini dressing*

##### *Ingredients*

|          |                                      |
|----------|--------------------------------------|
| 1/3 cup  | Tahini (Middle Eastern sesame paste) |
| 1/3 cup  | Water                                |
| 1/4 cup  | Plus 1 tablespoon fresh lemon juice  |
| 2 garlic | Cloves, chopped.                     |
| 3/4 tsp  | Salt                                 |
| 1/4 tsp  | Sugar (optional)                     |

### *Method*

Blend all ingredients in a blender until smooth.

### *To Serve*

|     |                 |
|-----|-----------------|
| 10  | Mini pitas      |
| 40g | Tomato diced    |
| 40g | Cucumber diced  |
| 20g | Onion red diced |
| 40g | Tahini dressing |

Assemble pita, meat (40-50g per pita), tomato, cucumber, onion and top with tahini dressing.

### 3. Mutton sliders, beetroot relish, rocket, mint yoghurt

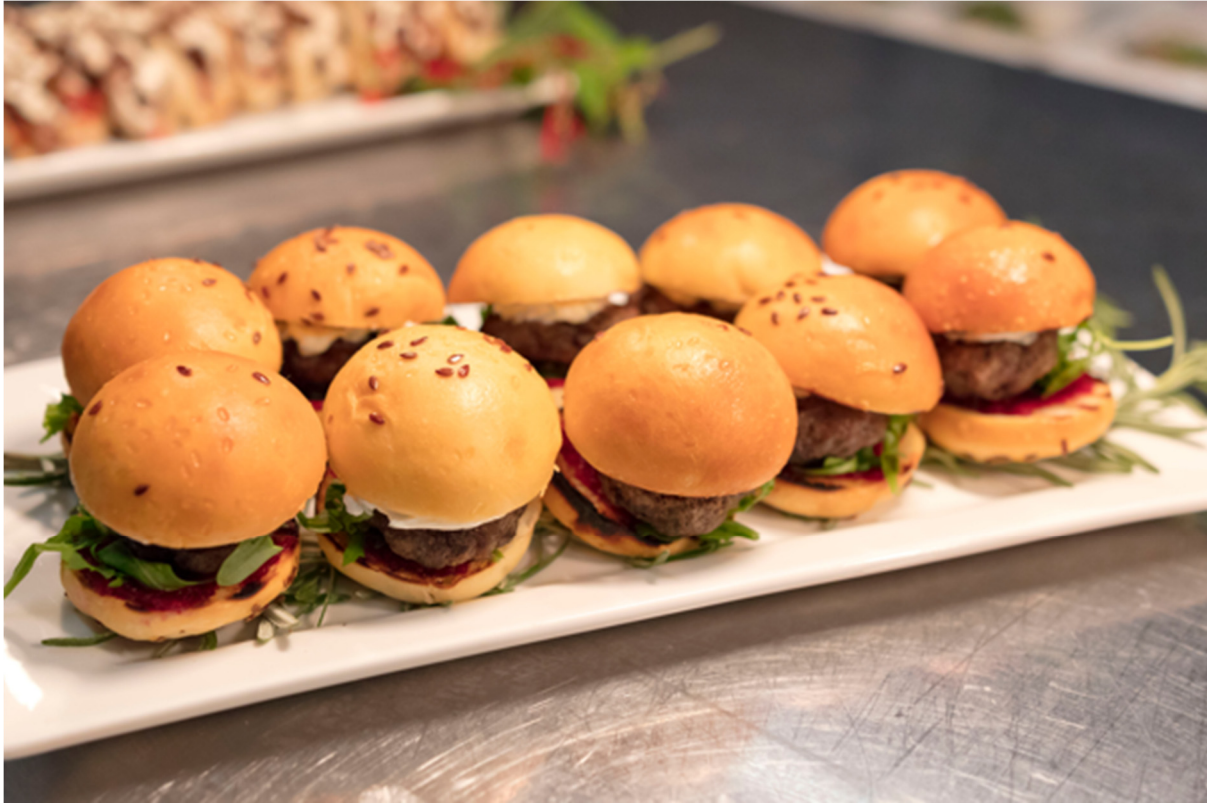

Figure 3. Mutton sliders, beetroot relish, rocket, mint yoghurt (WAI, 2018)

#### *Appetisers for 10*

##### *Beetroot relish*

###### *Ingredients*

|       |                                    |
|-------|------------------------------------|
| 1000g | Beetroot cooked                    |
| 300ml | Malt vinegar                       |
| 100g  | Dark brown sugar                   |
| 2     | Clove                              |
| 1 tsp | Ginger (minced)                    |
| 2     | Garlic clove (minced)              |
| 1     | Chilli bird's eye (finely chopped) |
| 1 tsp | Fennel seeds (toasted and crushed) |
| 4     | Black peppercorns (crushed)        |
| 30g   | Sea salt                           |

###### *Method*

Coarsely grate the beetroot and place in a bowl.

Put remaining ingredients into a pot and bring to the boil.

Simmer gently until the liquid has reduced by one-third its volume.

Pour hot liquid over the grated beetroot and allow to cool.

### ***Mutton patty***

#### ***Ingredients***

|      |                                    |
|------|------------------------------------|
| 500g | Mutton mince, offcuts with 20% fat |
| 50g  | Rice flour                         |
| 1    | Egg (beaten)                       |
| 5g   | Salt                               |
| 1g   | Pepper                             |

#### ***Method***

Mince offcuts using course mince size blade.

Place all the ingredients in a bowl and mix well until combined.

Form into patties 50g.

Grill to order.

### ***Mint Yogurt***

#### ***Ingredients***

|         |                                     |
|---------|-------------------------------------|
| 250g    | Natural yogurt                      |
| 50g     | Continental cucumber                |
| squeeze | Lemon juice                         |
| ½       | Garlic clove (minced)               |
| 4       | Mint leaves – large (finely sliced) |
| pinch   | Sea salt                            |

#### ***Method***

Coarsely grate the cucumber and place in a clean dry cloth.

Squeeze as much liquid out as possible and place in a bowl.

Add the rest of the ingredients and mix well.

Refrigerate until needed.

### ***Slider Assembly***

#### ***Ingredients***

|     |                 |
|-----|-----------------|
| 10  | Brioche bun     |
| 10  | Patties         |
| 50g | Beetroot relish |
| 50g | Rocket          |
| 50g | Minted yogurt   |

#### ***To Serve***

Place burger on grill, be careful not to burn.

Slice the brioche in half and brush with olive oil and lightly toast on grill.

Place the rested burger on bottom half of bread top with beetroot relish.

Top with rocket leaves, yoghurt and the top half of the bread.

Serve immediately with salted fries on a clean on a warm plate.



#### 4. Vietnamese style mutton Pho

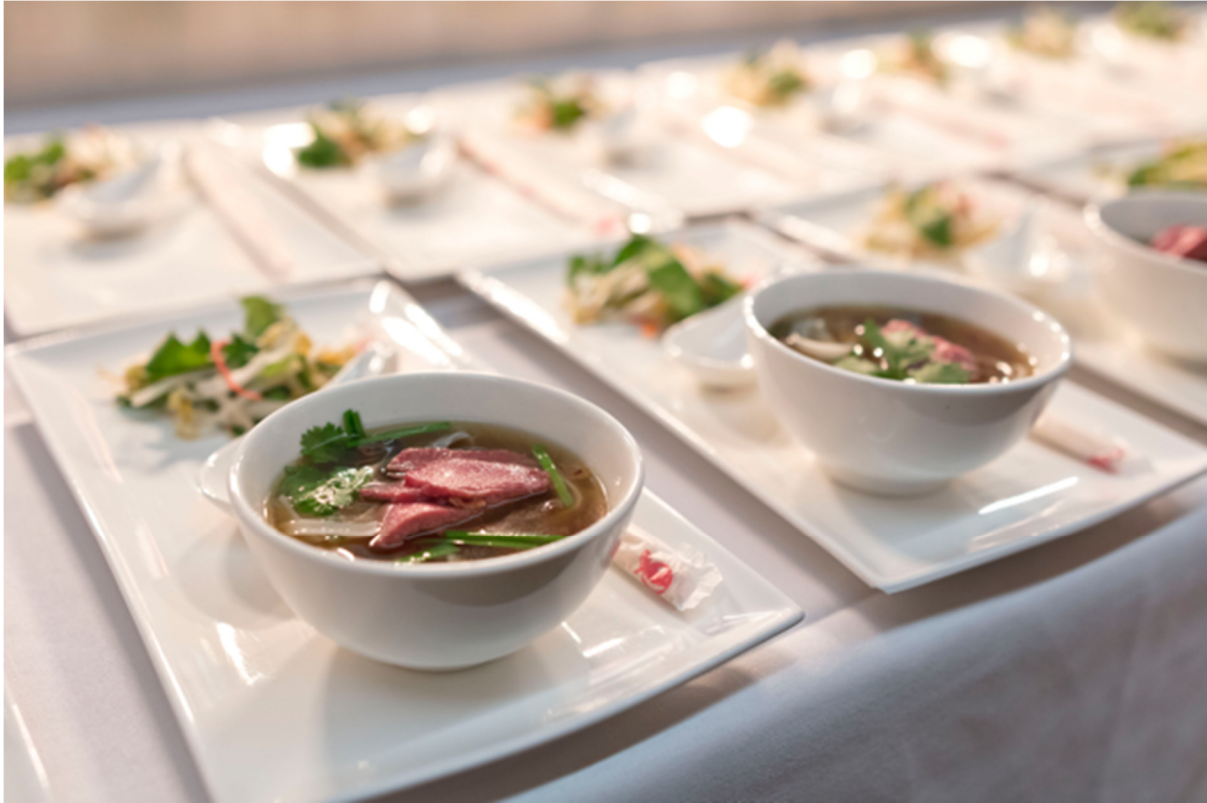

Figure 4. Vietnamese style mutton pho (WAI, 2018)

*Serves 10*

##### *Soup*

##### *Ingredients*

|                |                               |
|----------------|-------------------------------|
| 4              | Chicken carcasses             |
| 2kg            | Mutton bones                  |
| 5lt            | Water                         |
| 4              | Small onions                  |
| 7 large cloves | Garlic                        |
| 100g           | Fresh ginger                  |
| 8              | Cloves                        |
| 1 bunch        | Coriander roots and stems     |
| 1 x 4cm        | Cassia bark (Saigon cinnamon) |
| ½ tsp          | Cracked white pepper          |
| 60g            | Yellow rock sugar             |
| 2 Tbsp         | Fish sauce                    |
| 1 Tbsp         | Salt                          |
| 1 Tbsp         | Coriander seeds roasted       |

##### *Method*

Place the onions, garlic and ginger directly on a rack over a medium flame. Let the skin char (using tongs to rotate onion, garlic and ginger occasionally and to grab and discard any peeling onion skin).

After 15 minutes, the onions, garlic and ginger will have softened slightly and become sweetly fragrant. When amply charred (do not blacken the entire surface), remove from the heat.

Rinse the onions and garlic under cold running water, rubbing off the charred skin. Trim off and discard the blackened root and stem ends.

Use the edge of a teaspoon to remove the ginger skin. Hold it under cold water to wash off the blackened bits. Halve the ginger lengthwise and bruise lightly with the broad side of a cleaver or chef's knife. A little of the charred skin can remain as it will add a smoky flavour and colour the broth.

Rinse the chicken carcasses under cold water.

Place the chicken carcasses and mutton bones into a stock pot and cover with water. Bring to a boil over high heat and then lower the heat to a gentle simmer. Use a ladle or large, shallow spoon to skim off any scum that rises to the top.

Add all the other ingredients. Simmer the stock for another 2 hours

Strain the stock using a chinois (conical strainer) lined with oil filter paper. Cool in the blast chiller until between 0-4C, cover, label and date the stock, place in fridge for service.

### ***Asian Salad***

#### ***Ingredients***

|         |                                  |
|---------|----------------------------------|
| ½ bunch | Coriander picked leafy tops only |
| 100g    | Bean sprouts                     |
| ½ bunch | Vietnamese mint (húng)           |
| ½ bunch | Thai basil* (húng quế)           |
| 5 each  | Serrano chilli, thinly sliced    |
|         | Crisp mutton fat                 |

#### ***Method***

Pick, wash and drain all herbs. Dry in a salad spinner and place in a container lined with absorbent paper. Cover and refrigerate.

Pick through bean shoots and remove any unsightly root ends. Place in a container lined with absorbent paper cover, refrigerate.

#### ***Bowls for service***

|         |                                            |
|---------|--------------------------------------------|
| 200g    | Flat rice noodles (bánh phở) reconstituted |
| 300g    | Sous vide mutton back strap thinly sliced  |
| 5       | Spring onion, sliced finely                |
| 50g     | Fried shallots                             |
| 5 each  | Garlic chives 2cm pieces                   |
| ½ bunch | Coriander, picked leafy tops only          |



## 5. Piccata with textures of corn

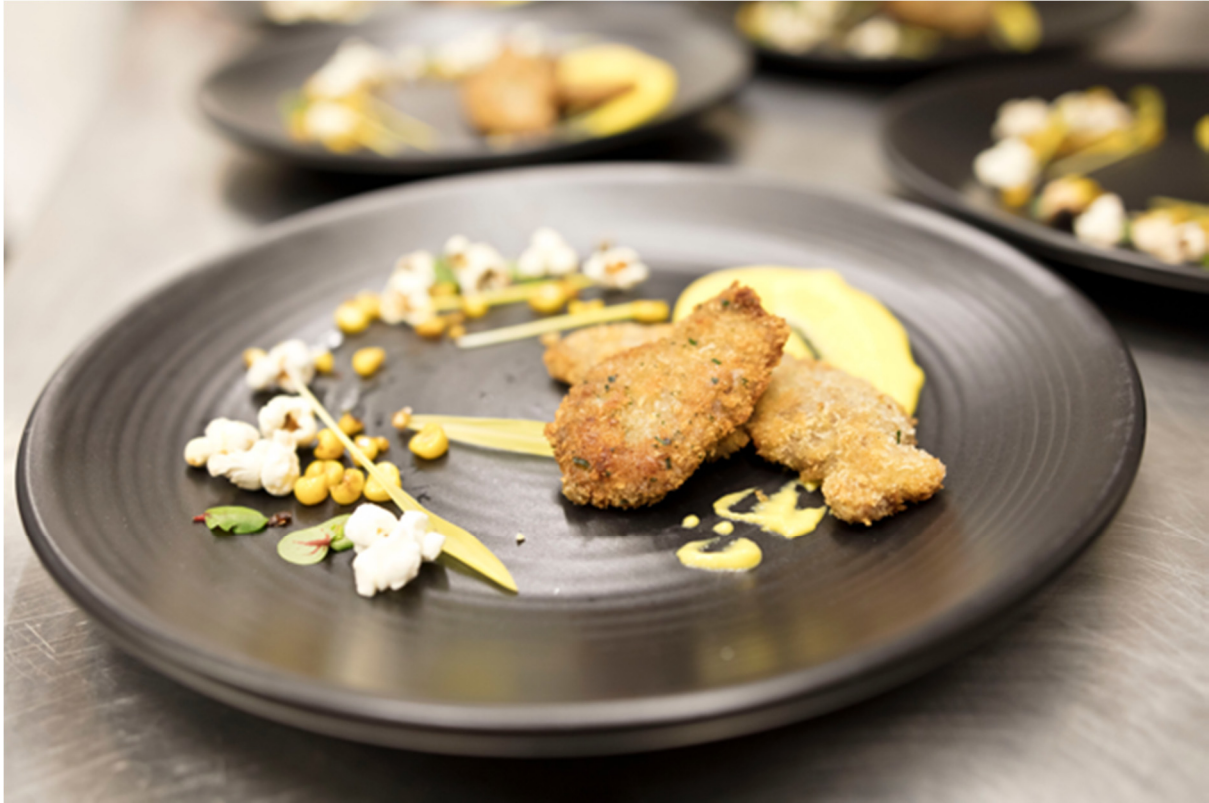

Figure 5. Piccata with textures of corn (WAI, 2018)

*Serves 10*

### *Piccata*

#### *Ingredients*

20 x 80g mutton topside slices, 3mm thick

#### *Method*

Crumb mutton topside slices in flour, egg wash, and bread crumb.

Shallow fry each schnitzel for 2 minutes on each side.

Rest for 2 minutes.

### *Sweet Corn Custard*

#### *Ingredients*

5 Corn cobs

#### *Method*

Cut all the kernels off the cob.

Blitz in the Thermomix until a fine puree.

Squeeze corn through a chinois (conical strainer), then pass through a fine strain.

Discard the solids and place the liquid into a clean Thermomix.

Set at 80 degrees for 5 mins on speed 4 (the natural starches within the corn will set this liquid into a custard-like setting).

*To Serve*

|          |                                                       |
|----------|-------------------------------------------------------|
| 50g      | Corn charred kernels                                  |
| 200g     | Corn custard                                          |
| ½ punnet | Shiso                                                 |
| ½ punnet | Corn shoots                                           |
| 50g      | Popped corn                                           |
| 10       | Mutton piccata (crumbed mutton topside shallow fried) |

*Method*

Remove kernels off the cob.

Cut and wash shiso and shoots; store for service.

Stir-fry corn in a tiny amount of oil until blistered and reserve.

## 6. Smoked mutton with purple salad and creamy fetta sauce

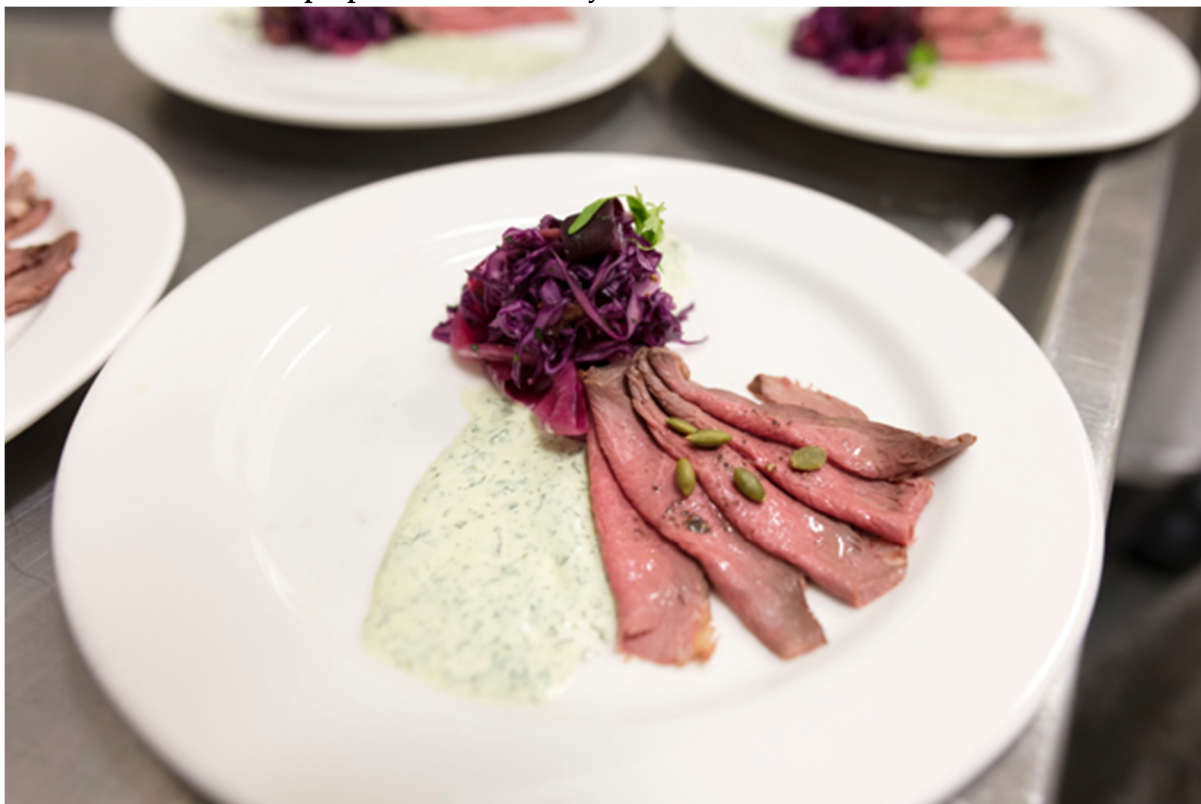

Figure 6. Smoked mutton with purple salad and creamy fetta sauce (WAI, 2018)

*Serves 10*

*Mutton round smoked*

*Ingredients*

1 Mutton round, trimmed

*Dry rub seasonings:*

|      |                      |
|------|----------------------|
| 200g | Brown sugar          |
| 40g  | Paprika sweet ground |
| 30g  | Salt                 |
| 30g  | Garlic powder        |
| 30g  | Onion powder         |
| 5g   | Chilli powder        |
| 15g  | Cracked pepper       |

*Method*

Mix all ingredients together.

*Smoking*

|      |                                          |
|------|------------------------------------------|
| 100g | Hickory wood chips, sprinkled with water |
| 1    | sprig Rosemary                           |
| 1    | sprig Sage                               |
| 1    | Bay leaf                                 |

### *Method*

Scatter wood chips, rosemary, sage and bay leaf over the bottom of a roasting dish, then position a wire rack inside dish.

Place mutton on rack, cover roasting dish with foil, secure tightly around edges.

Place roasting dish with silverside on top of stove on a low heat, cook and smoke for 10 minutes.

Place in oven at 120C, Cook to an internal temperature of 68C.

### *Pickled onion*

#### *Ingredients*

|       |                           |
|-------|---------------------------|
| 1.5kg | Sugar – castor            |
| 3lt   | Vinegar - Rice wine       |
| 45g   | Cinnamon quill            |
| 5g    | Cloves - whole            |
| 10g   | All spice ground          |
| 5g    | Chilli - Dried long whole |
| 3ea   | Bay leaf                  |
| 30    | Peppercorns - black       |
| 10g   | Star anise                |
| 2kg   | Onion - Red               |

### *Method*

Peel the onions and slice into 3cm circles.

Place the spices in muslin cloth.

Combine everything but the onions and bring to the simmer for 3 minutes; allow infusing off the heat for 1 hour.

Bring the brine to the boil and add 1/3 of the onions and simmer for 20 seconds, remove the onions and cool them down in the fridge

Repeat the process with the remaining 2/3 of the onions.

Repeat the whole process 2 more times. Thoroughly chill the brine, then add the onions.

This process should guarantee a crunchy pickle.

Make sure when storing the onions are covered by the liquid.

### *Salad*

#### *Salad Ingredients*

|            |                                       |
|------------|---------------------------------------|
| 140g       | Pumpkin seeds                         |
| 1          | Red cabbage /1kg                      |
| 150g       | Dried black mission figs, chopped     |
| 1 bunch    | Purple carrots / 500g                 |
| 1 cup each | Chopped parsley and mint, leaves only |

#### *Creamy fetta sauce Ingredients*

|       |                      |
|-------|----------------------|
| 250ml | Greek yoghurt        |
| 250g  | Fetta                |
| 1tbl  | Dill                 |
| ½ tsp | Apple cider vinegar  |
|       | Pepper black cracked |

### *Method*

Whisk all dressing ingredients together and set aside.

On a slicer, slice the cabbage as thinly as possible. Place in a very large bowl.

Slice the carrots horizontally into rounds, or as desired, add to cabbage.

Wash the herbs well, spin dry, dice the parsley (including stems) and mint (leaves only). Add to the bowl.

In a dry skillet over medium heat, lightly toast the pumpkin seeds until fragrant. Remove from heat and set aside.

Pour pickle liquid over the vegetables and herbs and toss well to coat. Add pumpkin seeds and fold to combine.

Season to taste (the salad may need more salt at this point).

Let stand at room temperature for about 30 minutes, toss before serving.

*To Serve*

Smoked mutton

Purple salad

Creamy fetta sauce

Pumpkin seeds

Micro coriander

## 7. 10 hour mutton rump on smoked eggplant, coriander chutney and dukkah

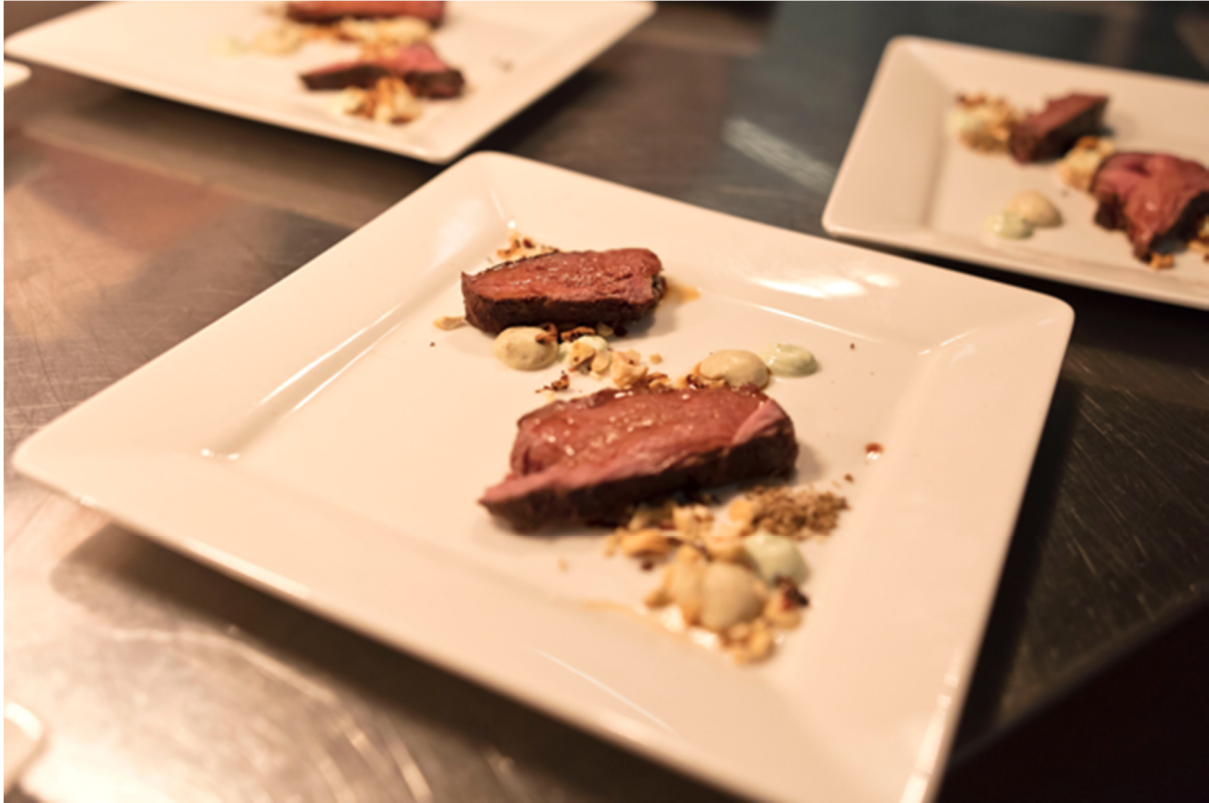

Figure 7. 10 hour mutton rump on smoked eggplant, with coriander chutney and dukkah (WAI, 2018)

*Serves 10*

### *Rump*

#### *Method*

Remove main muscle from rump leaving the fat on.

Cook rump for 10 hours at 58C sous vide (meat wrapped in plastic in water bath/thermoregulator).

Sear in hot pan.

Rest and slice.

### *Smoked eggplant*

#### *Ingredients*

|       |                        |
|-------|------------------------|
| 2     | Medium aubergines      |
| 1     | Aubergine              |
| 20ml  | Lemon (juice)          |
| 2     | Garlic cloves, crushed |
| 150ml | Pot set thick yogurt   |
| 60ml  | Tahini                 |



### *Method*

Heat grill to very hot. Grill for 25 minutes, turning occasionally, until soft – the skin will remain firm, but the flesh will soften. Lift the aubergines off the grill and leave until cool enough to handle.

Using a sharp knife, score the grilled flesh and scoop out the flesh with a spoon. Tip into a bowl and mash with a fork until you get a thick pulp. Beat in the lemon juice and garlic. Add the yogurt and Tahina, and season. Serve while still warm.

### *Seed Dukkah*

#### *Ingredients*

|     |                                     |
|-----|-------------------------------------|
| 80g | Sesame seeds                        |
| 40g | Coriander seeds                     |
| 40g | Cumin seeds                         |
| 10g | Freshly ground black pepper         |
| 5g  | Flaked sea salt (like Maldon brand) |

### *Method*

Preheat oven to 180°C.

Heat a medium frying pan over medium heat. Add the sesame seeds and cook, stirring, for 1-2 minutes or until golden. Add to the bowl.

Place coriander seeds and cumin seeds in frying pan over medium heat, and cook, stirring frequently, for 1-2 minutes or until aromatic and seeds begin to pop. Transfer seeds to a mortar and pestle. Pound until finely crushed (alternatively, use a coffee or spice grinder). Add the crushed spices, pepper and salt mix well.

### *To serve*

|       |                   |      |
|-------|-------------------|------|
| 1000g | Mutton Rump       | 100g |
| 100g  | Puffed wild rice  |      |
| 200g  | Smoked eggplant   |      |
| 100g  | Coriander chutney |      |
| 100g  | Seed Dukkha       |      |

#### 8. Braised shoulder: Grilled cutlet on truffle mash, mushroom crumble, edamame

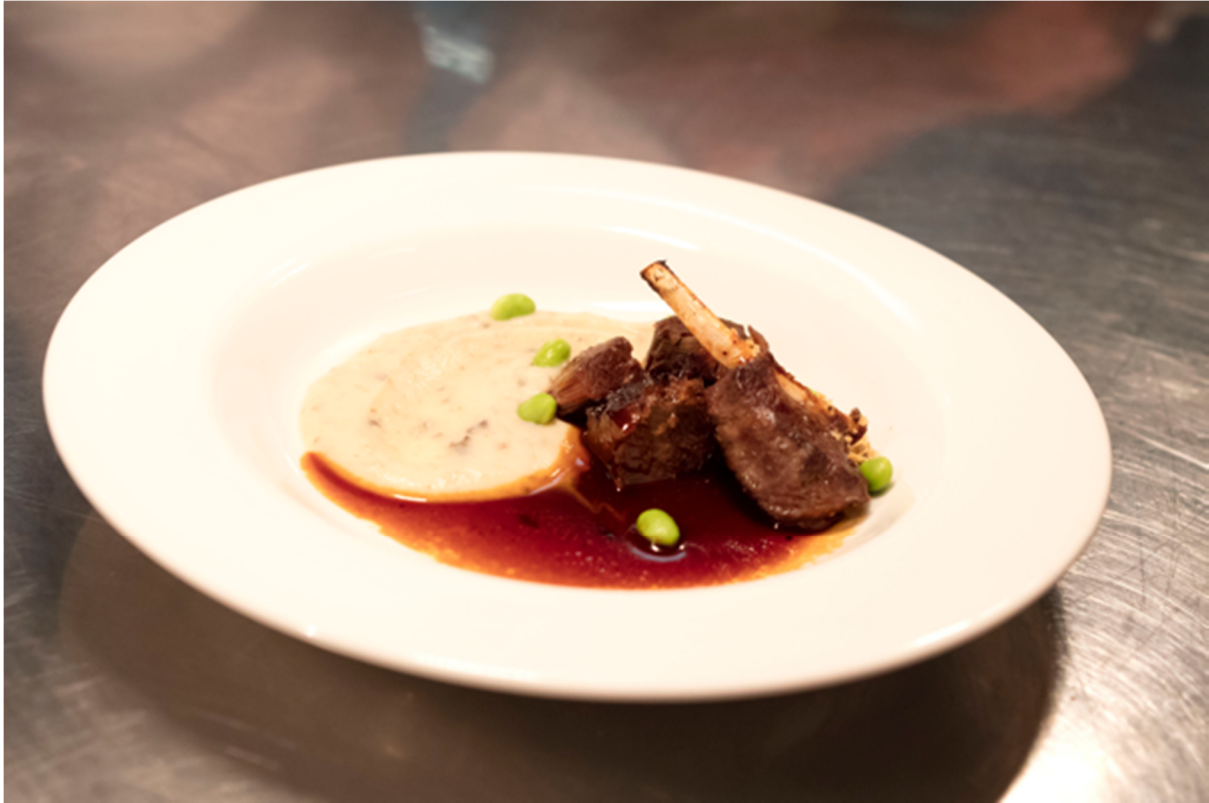

Figure 8. Braised shoulder: grilled cutlet on truffle mash, mushroom crumble, edamame (WAI, 2018)

*Serves 10*

#### *Braised Mutton*

##### *Ingredients*

|          |                                                            |
|----------|------------------------------------------------------------|
| 2.5kg    | Mutton shoulder with neck, trimmed of excess fat and sinew |
| 250g     | Carrots, mirepoix cut (2cm diced)                          |
| 250g     | Onions, mirepoix cut (2cm diced)                           |
| 2 sticks | Celery, mirepoix cut (2cm diced)                           |
| 6 cloves | Garlic                                                     |
| 4 sprigs | Thyme                                                      |
| 6 sprigs | Oregano                                                    |
| 4 each   | Bay leaves, fresh                                          |
| 1 quill  | Cinnamon                                                   |
| 4 whole  | Clove                                                      |
| 40 ml    | Honey                                                      |
| Salt     |                                                            |
| 10 each  | Peppercorns, black                                         |
| 500g     | Tomato peeled diced (Italian tinned)                       |
| 500ml    | Port                                                       |
| 1.5l     | Veal stock                                                 |

##### *Method*

Remove excess fat and sinew from the mutton, cut 3- 4 large pieces.

Season and fry mutton pieces in hot oil until a deep golden brown colour all over. Remove and place into a braising dish.

Sauté the mirepoix (diced) vegetables until golden add tomato and cook until caramelised.

Add the red wine and aromatics. Bring to simmer and reduce liquid by half.  
 Add the veal stock and honey, bring to the boil. Pour over the mutton.  
 Braise in the oven at 180°C for 2-2.5 hours.  
 Remove the mutton, press in a tray lined with silicon paper. Top with silicon and another tray. Place into the blast chiller with a weight on top of the tray until chilled between 2-5C.  
 When cold cut into 2cm dice, reserve for service.  
 Strain the braising juices through a chinois (conical strainer). Push through as much vegetable as possible. Chill, remove fat and discard.  
 Reduce braising liquid if needed and reserve for service.

### ***Grilled cutlet***

Remove excess fat and sinew from the cutlets.  
 Lightly oil and season with salt and pepper.  
 Grill on hot grill 2 minutes each side.  
 Rest for 2 minutes and then serve.

### ***Potato puree***

#### *Ingredients*

|       |                           |
|-------|---------------------------|
| 1kg   | Potatoes, Desiree, peeled |
| 200ml | Cream                     |
| 200g  | Butter, unsalted, diced   |
| 20g   | truffle paste             |

#### *Method*

Cut the potato into large even pieces. Place onto a steamer tray.  
 Steam the potato in the combi oven until tender. Remove and allow the steam to evaporate.  
 Remove the potatoes and immediately push through a drum sieve.  
 Put the mix into a pot and stir constantly over a medium heat until hot.  
 Add the butter and mix well until fully blended. Add the cream and truffle, mix well and season with salt.

### ***Mushroom crumble***

#### *Ingredients*

|      |                      |
|------|----------------------|
| 100g | Bread gluten free    |
| 50g  | Mushroom powder      |
| 20ml | Oil, Truffle infused |

#### *Method*

Process bread to crumb.  
 Toast in oven at 180C.  
 Mix together.

## ***Edamame***

### *Ingredients*

100g Soy beans

### *Method*

Blanch soy beans.

Salt, pepper and oil

### *.To serve*

|       |                  |
|-------|------------------|
| 1000g | Braised Shoulder |
| 10    | Mutton Cutlets   |
| 400g  | Truffle mash     |
| 200g  | Mushroom crumble |
| 100g  | Soy beans        |
| 100ml | Mutton Jus       |
